# Supplementary material for: Novel Schiff base cobalt(ii) phthalocyanine with appliance of MWCNTs on GCE: enhanced electrocatalytic activity behaviour of α-amino acids
Source: Royal Society of Chemistry journal article supplement (doi:10.1039/d1ra01815a), 2021-01-01
Supplement: d1ra01815a1.pdf [file d1ra01815a1.pdf]

## Novel Schiff Base Cobalt (II) Phthalocyanine with Appliance of MWCNTs: Enhanced electrocatalytic activity behaviour of $\alpha$ -amino acids

Mounesh<sup>1\*</sup>, T. M. Sharanakumar<sup>2</sup>, N. Y. Praveen Kumar<sup>1</sup>, K. R. Venugopala Reddy<sup>1</sup>, K. B. Chandrakala<sup>1</sup>, L. Arunkumar<sup>1</sup>, C. C. Vidyasagara<sup>3</sup>

<sup>\*1</sup> Department of Studies and Research in Chemistry, Vijayanagara Srikrishnadevaraya University, Ballari-583105 Karnataka (India)

<sup>2</sup> Department of Studies and Research in Chemistry, Ballari Institute of Technology and Management, Ballari-583104 Karnataka (India)

<sup>3</sup> Department of Studies and Research in Chemistry, Rani Chennamma University, Belagavi-591156 Karnataka (India)

(Email: [mounesh.m.nayak@gmail.com](mailto:mounesh.m.nayak@gmail.com), Cell No: +91-8197546693)

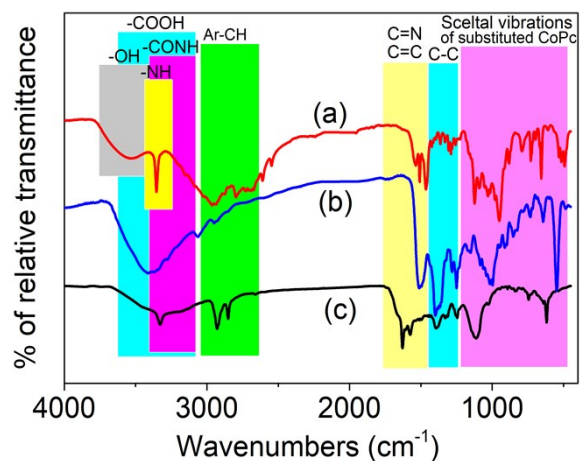

**Fig.S1:** FTIR spectra of (a) ANImMMP (b) CoTcPc and (c) CoTANImMMPPc

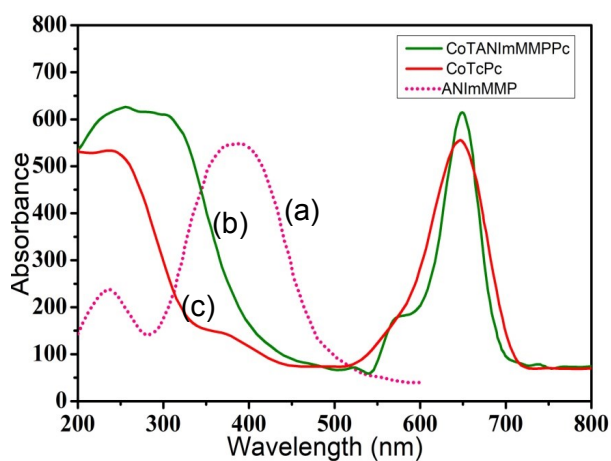

**Fig.S2:** UV-Visible spectra of (a) ANImMMP (b) CoTcPc and (c) CoTANImMMPPc



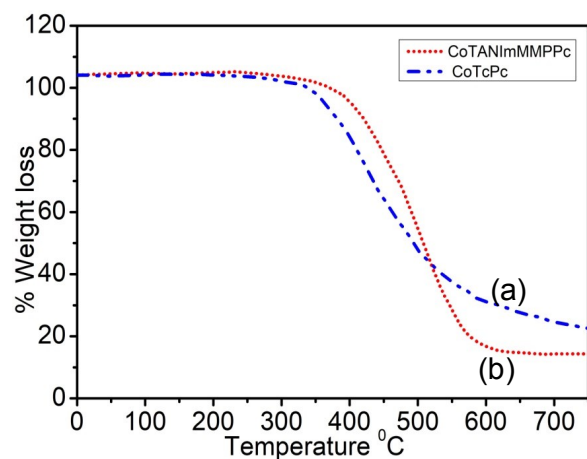

**Fig.S5:** TG analysis of (a) CoTCAPc and (b) CoTANImMPPc.

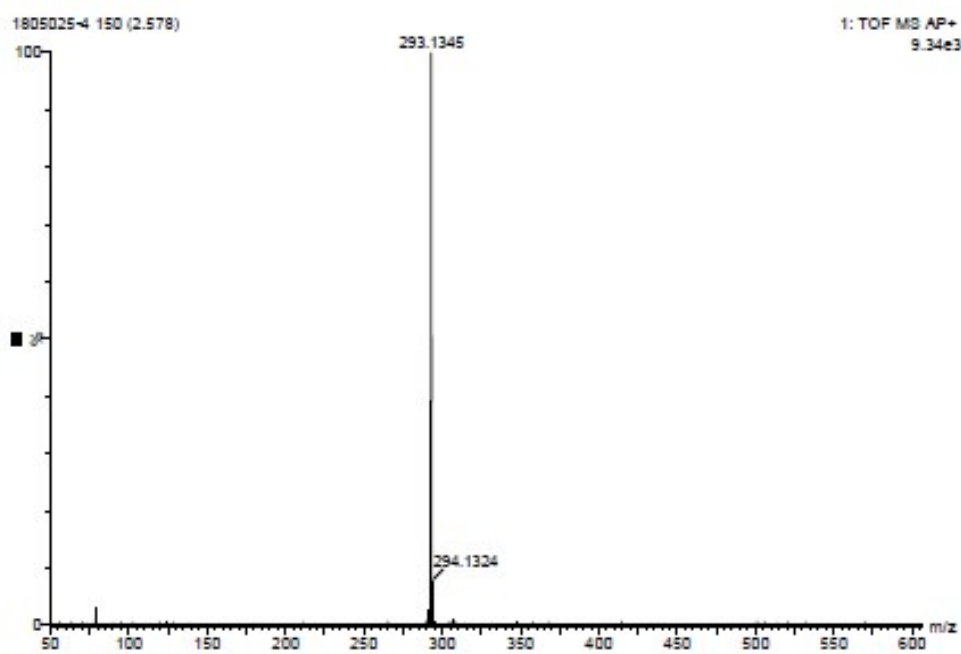

**Fig.S6:** Mass spectrum of ANImMMP.

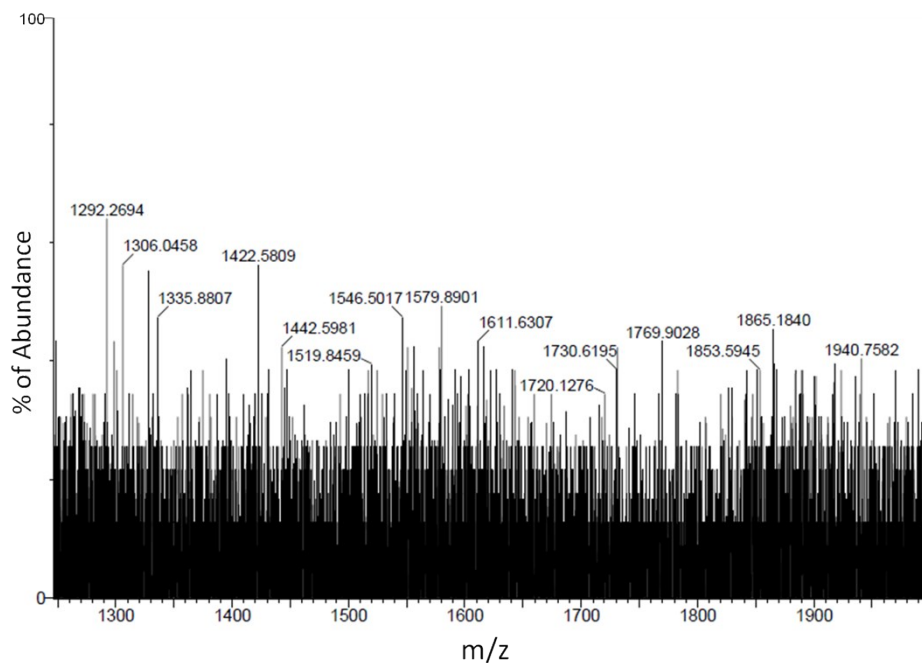

**Fig.S7:** ESI-MS mass spectrum of CoTANImMMPPc.

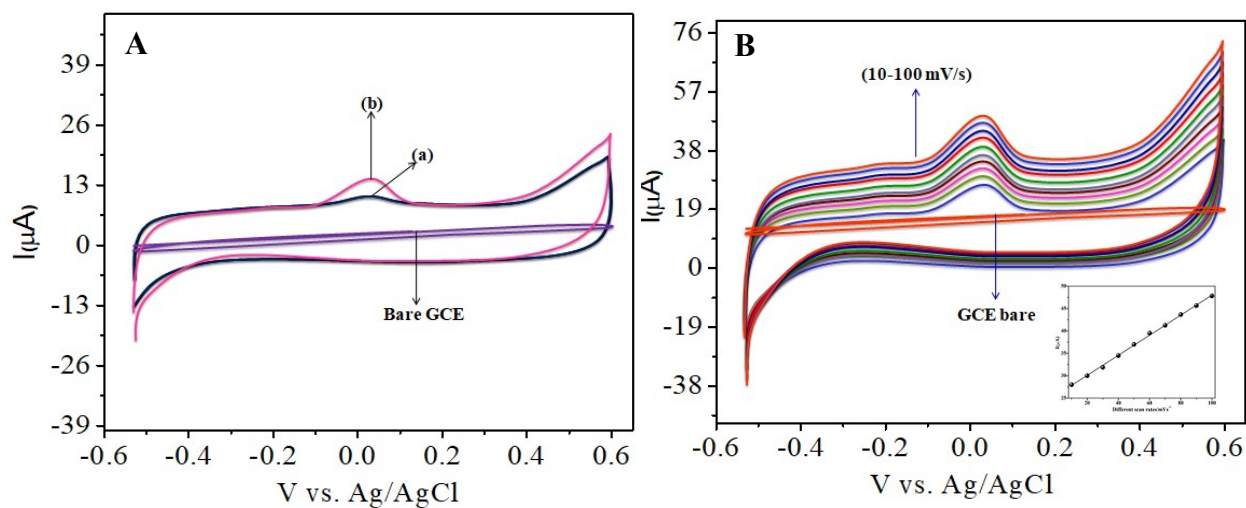

**Fig.S8:** Experimental CVs of modified GCE in (pH=7) PBS electrolyte solution at peaks: (A) inset bare GCE, (a) CoTANImMMPPc/GCE, (b) CoTANImMMPPc/CNTs/GCE; at scan rate  $50 \text{ mVs}^{-1}$  and (B) different scan rates of CoTANImMMPPc/CNTs/GCE/ $\text{mVs}^{-1}$ .

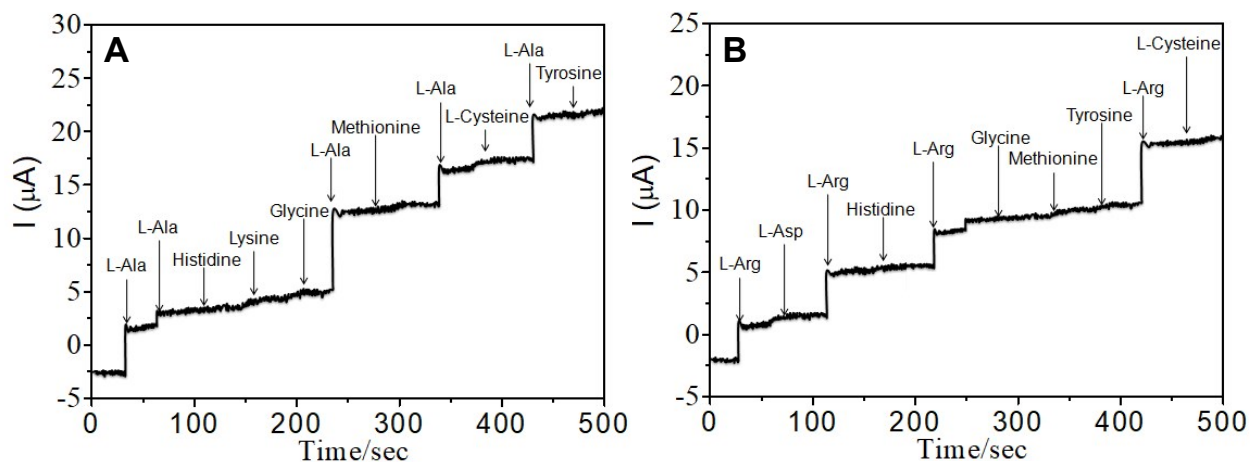

**Fig.S9:** Experimental amperometry interference responses of CoTANImMMPPc/CNTs-GCE in (pH-7) PBS at peaks: (A, B) 200 nM concentrations of Histidine, Lysine, Glycine, Methionine, L-Cysteine, Tyrosine, L-Asparagine by during L-Ala and L-Arg; applied potential  $\pm 150$  mV.

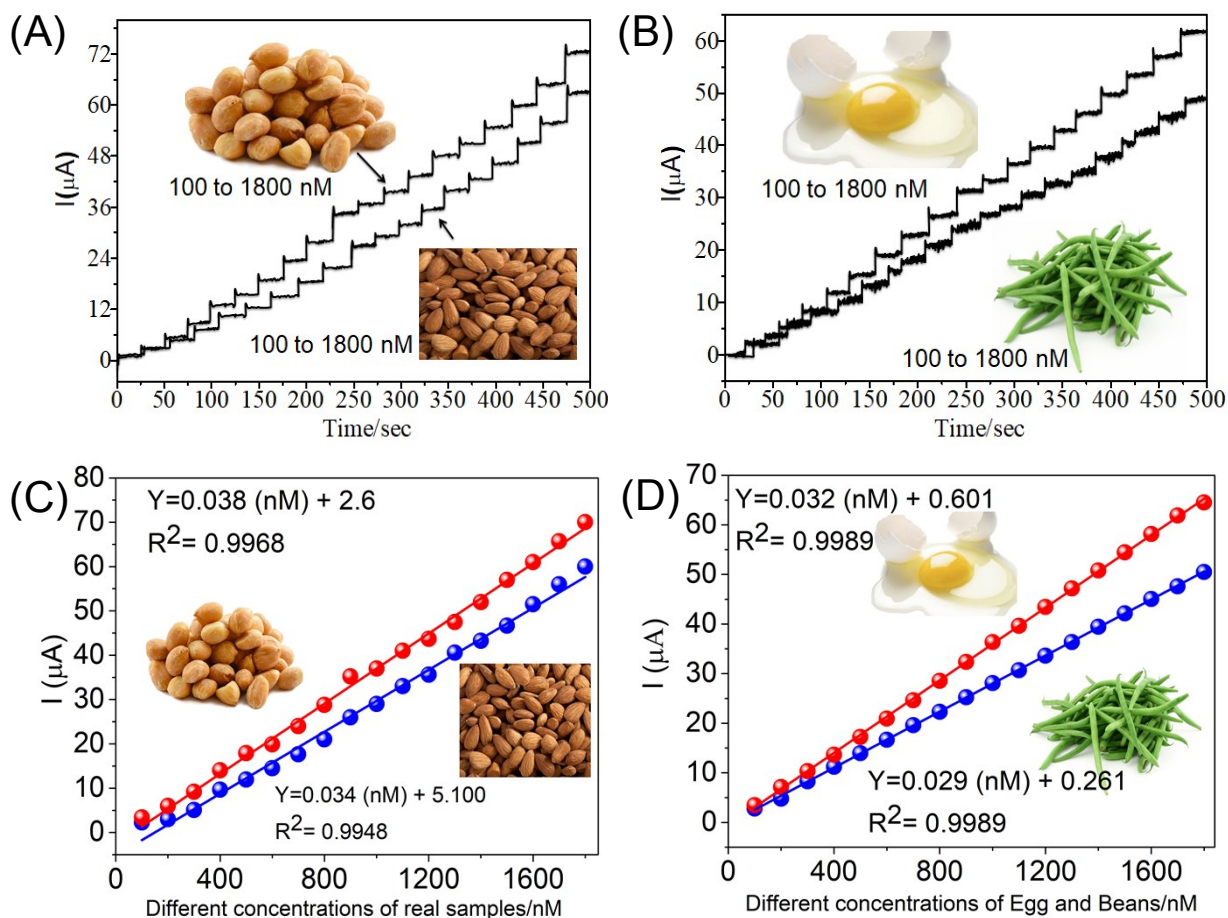

**Fig.S10:** Real sample analysis: Amperometric responses of CoTANImMMPPc/CNTs-GC electrode for each sequential addition of real samples containing L-Alanine and L-Arginine into continuously stirred phosphate buffer (pH-7). (A) Peanuts and Almonds, (B) Egg and Green Beans. Amperometric experiments are performed using CoTANImMMPPc/CNTs-GC electrode towards each sequential addition of real samples into phosphate buffer (pH-7). The rotation speed = 1500RPM and electrode potential =  $\pm 150\text{mV}$ .

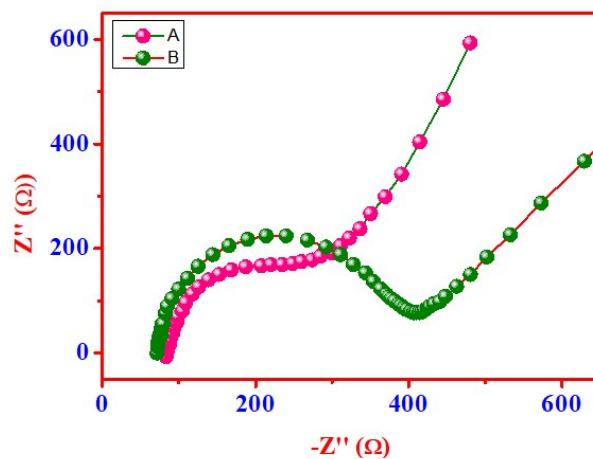

**Fig.S11:** Nyquist plot of A) CoTANImMMPPc/CNTs-GC and B) Bare GCE

**Table S1:** Elemental analysis of CoTANImMMPPc.

| Compound Name<br>(Yield)<br>color   | Empirical formula<br>weight                | Elemental analysis (%)<br>Calcd: Found                                                           |
|-------------------------------------|--------------------------------------------|--------------------------------------------------------------------------------------------------|
| CoTANImMMPPc<br>(95%)<br>Dark green | $C_{108}H_{79}CoN_{16}O_{12}$<br>(1851.52) | C; 70: (69.93)<br>H; 4.33: (4.27)<br>N; 12.14: (12.07)<br>O; 10.37: (10.25)<br>Co; 3.185: (3.15) |
